# Supplementary material for: Brchli1 mutation induces bright yellow leaves by disrupting magnesium chelatase I subunit function in Chinese cabbage (Brassica rapa L. ssp. pekinensis)
Source: Front Plant Sci. 2024 Aug 30;15:1450242. doi: 10.3389/fpls.2024.1450242 (PMC11392721; doi:10.3389/fpls.2024.1450242)
Supplement: Supplementary file 2 [file Table1.xlsx]

## Sheet: Table S1
Table S1 Photosynthetic parameters of ‘FT’ and byl.
Characteristics	FT	byl
Net photosynthetic rate (Pn, μmol CO2 m−2 s−1)	6.54±0.28	5.22±0.04**
Stomatal conductance (Gs, mol H2O m−2 s−1)	0.70±0.04	0.46±0.04**
Intercellular CO2 concentration (Ci, μmol CO2 mol−1)	370.78±6.13	395.78±5.61**
Transpiration rate (Ts, mmol H2O m−2 s−1)	2.89±0.05	2.58±0.06**

## Sheet: Table S2
Table S2 Genetic analysis in byl.
Generation	Total	Green leaf	Golden leaf	Segregation ratio	χ2	χ20.05
P1(‘FT’)	15	15	0
P2(gl2)	15	0	15
F1(P1×P2)	15	15	0
F1′(P2×P1)	15	15	0
F2	772	571	201	2.84	0.44	3.841

## Sheet: Table S3
Table S3 Photosynthetic parameters of byl under varying light intensities
Characteristics	320 μmol m−2 s−1	40 μmol m−2 s−1
Net photosynthetic rate (Pn, μmol CO2 m−2 s−1)	4.476±0.14	5.312±0.12**
Stomatal conductance (Gs, mol H2O m−2 s−1)	0.4433±0.02	0.5151±0.01**
Intercellular CO2 concentration (Ci, μmol CO2 mol−1)	380.7±1.33	402.5±1.78**
Transpiration rate (Ts, mmol H2O m−2 s−1)	2.332±0.10	2.715±0.05**

## Sheet: Table S4
Table S4 Candidate SNP information.
Chromosome	Position	WT	MUT	snpindex	MutationType	GeneID
A01	2003129	C	T	0.588235	nonsynonymous SNV	BraA01g004150.3.5C
A01	2172248	C	T	0.5	nonsynonymous SNV	BraA01g004580.3.5C
A01	2272784	C	T	0.611111	nonsynonymous SNV	BraA01g004840.3.5C
A01	2852191	C	T	0.866667	nonsynonymous SNV	BraA01g005980.3.5C
A01	3667472	C	T	0.925	nonsynonymous SNV	BraA01g007580.3.5C
A01	3776079	C	T	0.941176	nonsynonymous SNV	BraA01g007770.3.5C
A01	4087676	C	T	0.84	nonsynonymous SNV	BraA01g008400.3.5C
A01	4880243	C	T	0.969697	synonymous SNV	BraA01g009670.3.5C
A01	5094535	C	T	1	nonsynonymous SNV	BraA01g010040.3.5C
A01	6177499	C	T	1	nonsynonymous SNV	BraA01g011840.3.5C
A01	6261759	C	T	1	nonsynonymous SNV	BraA01g012010.3.5C
A01	6962460	C	T	0.826087	synonymous SNV	BraA01g013310.3.5C
